# Supplementary material
Source: MDPI journal article supplement (https://www.mdpi.com/2410-3888/8/9/439)

## Supplementary Material

Table S1 Feed formulations for fish meal replacement group

| Ingredient (%)                         | Group1 | Group2 | Group3 | Group4 | Group5 |
|----------------------------------------|--------|--------|--------|--------|--------|
| fish meal                              | 10     | 5      | 0      | 0      | 0      |
| Soybean meal                           | 24     | 24     | 24     | 24     | 24     |
| extruded soybean                       | 0      | 10     | 10     | 0      | 0      |
| rapeseed meal(China)                   | 10     | 10     | 10     | 10     | 10     |
| rapeseed meal(Canda)                   | 15     | 15     | 15     | 15     | 15     |
| sunflower seed meal                    | 9      | 9      | 9      | 9      | 9      |
| cottonseed meal                        | 0      | 0      | 0      | 10.5   | 0      |
| corn gluten meal                       | 0      | 0      | 5      | 0      | 10.2   |
| Corn DDGS                              | 5      | 5      | 5      | 5      | 5      |
| Barley                                 | 7      | 7      | 7      | 7      | 7      |
| Wheat                                  | 4      | 4      | 4      | 4      | 4      |
| Soybean oil                            | 1.6    | 0      | 0.4    | 2.5    | 2.4    |
| Soybean phospholipid oil               | 4      | 4      | 4      | 4      | 4      |
| Calcium dihydrogen phosphate           | 2.5    | 2.5    | 2.5    | 2.5    | 2.5    |
| Bentonite                              | 5.4    | 2      | 1.6    | 4      | 4.4    |
| Mineral premix <sup>a</sup>            | 1.25   | 1.25   | 1.25   | 1.25   | 1.25   |
| Vitamin premix <sup>a</sup>            | 1.25   | 1.25   | 1.25   | 1.25   | 1.25   |
| Total                                  | 100    | 100    | 100    | 100    | 100    |
| Proximate composition (%) <sup>b</sup> |        |        |        |        |        |
| Crude protein                          | 32.18  | 32.39  | 32.44  | 32.39  | 32.40  |
| Crude lipid                            | 8.32   | 8.35   | 8.34   | 8.37   | 8.30   |
| Crude fiber                            | 6.79   | 7.02   | 6.83   | 6.73   | 6.43   |
| Crude ash                              | 13.47  | 9.82   | 8.53   | 10.95  | 10.69  |

<sup>a</sup> Mineral premix and vitamin premix were purchased from

<sup>b</sup> The proximate composition of diets was calculated by Excel software based on the data on China feed database (<https://www.chinafeeddata.org.cn>)

Table S2 Feed formulations for plant protein replacement group

| Ingredient (%)                         | Group4 | Group5 | Group6 | Group7 | Group8 | Group9 | Group10 | Group11 | Group12 | Group13 | Group14 | Group15 | Group16 | Group17 | Group18 | Group19 |
|----------------------------------------|--------|--------|--------|--------|--------|--------|---------|---------|---------|---------|---------|---------|---------|---------|---------|---------|
| Soybean meal                           | 24     | 24     | 16     | 8      | 0      | 24     | 24      | 16      | 8       | 24      | 24      | 24      | 24      | 24      | 24      | 24      |
| rapeseed meal(China)                   | 10     | 10     | 10     | 10     | 10     | 10     | 0       | 10      | 10      | 10      | 10      | 10      | 10      | 10      | 10      | 10      |
| rapeseed meal(Canda)                   | 15     | 15     | 15     | 15     | 15     | 5      | 5       | 15      | 15      | 15      | 13.5    | 11.5    | 0       | 3.75    | 7.5     | 11.25   |
| fermented rapeseed meal                | 0      | 0      | 0      | 0      | 0      | 0      | 0       | 0       | 0       | 0       | 0       | 0       | 15      | 11.25   | 7.5     | 3.75    |
| sunflower seed meal                    | 9      | 9      | 9      | 9      | 9      | 19.2   | 29      | 19      | 31      | 9       | 9       | 9       | 9       | 9       | 9       | 9       |
| cottonseed meal                        | 10.5   | 0      | 10.5   | 10.5   | 10.5   | 10.5   | 10.5    | 10.5    | 10.5    | 10.5    | 10.5    | 10.5    | 10.5    | 10.5    | 10.5    | 10.5    |
| corn gluten meal                       | 0      | 10.2   | 0      | 0      | 0      | 0      | 0       | 0       | 0       | 0       | 0       | 0       | 0       | 0       | 0       | 0       |
| peanut meal                            | 0      | 0      | 7.3    | 14.6   | 22     | 0      | 0       | 0       | 0       | 0       | 0       | 0       | 0       | 0       | 0       | 0       |
| corn DDGS                              | 5      | 5      | 5      | 5      | 5      | 5      | 5       | 5       | 2.5     | 5       | 5       | 5       | 5       | 5       | 5       | 5       |
| barley                                 | 7      | 7      | 7      | 7      | 7      | 7      | 7       | 7       | 7       | 7       | 7       | 7       | 7       | 7       | 7       | 7       |
| wheat                                  | 4      | 4      | 4      | 4      | 4      | 4      | 4       | 4       | 4       | 4       | 10      | 14      | 4       | 4       | 4       | 4       |
| soybean oil                            | 2.5    | 2.4    | 2.5    | 2.5    | 2.5    | 2.5    | 2.8     | 2.5     | 2.6     | 2.5     | 1       | 0       | 2.5     | 2.5     | 2.5     | 2.5     |
| Soybean phospholipid oil               | 4      | 4      | 4      | 4      | 4      | 4      | 4       | 4       | 4       | 4       | 4       | 4       | 4       | 4       | 4       | 4       |
| Calcium dihydrogen phosphate           | 2.5    | 2.5    | 2.5    | 2.5    | 2.5    | 2.5    | 2.5     | 2.5     | 2.5     | 2.5     | 2.5     | 2.5     | 2.5     | 2.5     | 2.5     | 2.5     |
| Bentonite                              | 4      | 4.4    | 4.7    | 5.4    | 6      | 3.8    | 3.7     | 2       | 0.4     | 4       | 1       | 0       | 4       | 4       | 4       | 4       |
| Mineral premix <sup>a</sup>            | 1.25   | 1.25   | 1.25   | 1.25   | 1.25   | 1.25   | 1.25    | 1.25    | 1.25    | 1.25    | 1.25    | 1.25    | 1.25    | 1.25    | 1.25    | 1.25    |
| Vitamin premix <sup>a</sup>            | 1.25   | 1.25   | 1.25   | 1.25   | 1.25   | 1.25   | 1.25    | 1.25    | 1.25    | 1.25    | 1.25    | 1.25    | 1.25    | 1.25    | 1.25    | 1.25    |
| Total                                  | 100    | 100    | 100    | 100    | 100    | 100    | 100     | 100     | 100     | 100     | 100     | 100     | 100     | 100     | 100     | 100     |
| Proximate composition (%) <sup>b</sup> |        |        |        |        |        |        |         |         |         |         |         |         |         |         |         |         |
| Crude protein                          | 32.39  | 32.40  | 32.39  | 32.40  | 32.46  | 32.41  | 32.39   | 32.40   | 32.48   | 32.57   | 32.59   | 32.36   | 32.39   | 32.39   | 32.39   | 32.39   |
| Crude lipid                            | 8.37   | 8.30   | 8.37   | 8.36   | 8.35   | 8.37   | 8.32    | 8.39    | 8.31    | 8.37    | 6.94    | 5.98    | 8.37    | 8.37    | 8.37    | 8.37    |
| Crude fiber                            | 6.73   | 6.43   | 6.80   | 6.87   | 6.95   | 7.32   | 7.89    | 8.16    | 9.79    | 6.52    | 6.67    | 6.51    | 6.73    | 6.73    | 6.73    | 6.73    |



Table S3 Proximate composition of commercial feed for juvenile fish

| Proximate composition (%) |       |
|---------------------------|-------|
| Crude protein             | 32.49 |
| Crude lipid               | 7.76  |
| Crude fiber               | 8.86  |
| Crude ash                 | 10.13 |

Figure S1 Weight-length regression analysis of Juvenile fish

### Model Summary and Parameter Estimates

Dependent Variable: Weight

| Equation | R Square | Model Summary |     |     |      | Parameter Estimates |       |
|----------|----------|---------------|-----|-----|------|---------------------|-------|
|          |          | F             | df1 | df2 | Sig. | Constant            | b1    |
| Power    | .978     | 6686.646      | 1   | 149 | .000 | 3.023E-5            | 3.023 |

The independent variable is length.

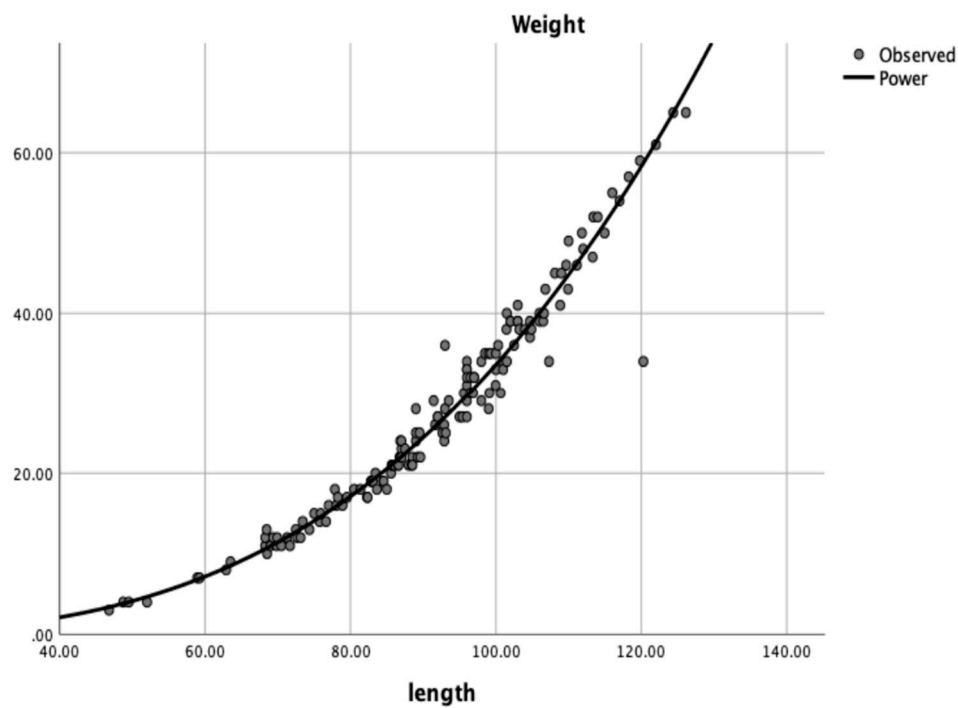

Supplement: s1 [file s1]
